# Supplementary material
Source: publisher site journal article supplement (https://www.dovepress.com/article/247279)
Supplement: Supplementary file 1 [file get_supplementary_file.php]

ORIGINAL RESEARCH

Kai Zhang et al

# Prediction of pathologic complete response by ultrasound and magnetic resonance imaging after neoadjuvant chemotherapy in patients with breast cancer

Kai Zhang#

Jiawei Li#

Qian Zhu

Cai Chang

Department of Medical Ultrasound, Fudan University Shanghai Cancer Center, Shanghai, China.

# These authors contributed equally to this work.

Correspondence: Cai Chang

Fudan University Shanghai Cancer Center, No 270, Dong’an Road, Xuhui District, Shanghai, 200032, China

Tel: +86 180 1731 2605

Fax: +86 21 6417 4774

E-mail: changc62@126.com

**Supplemental Table S1** pCR (ypT0) rates in different subtypes

| **Subtypes** | **US** | | **MRI** | | **US+MRI** | |
| --- | --- | --- | --- | --- | --- | --- |
| **pCR** | **Non-pCR** | **pCR** | **Non-pCR** | **pCR** | **Non-pCR** |
| HR+/HER2+ | 61(28.4) | 154(71.6) | 56(28.4) | 141(71.6) | 50(27.2) | 134(72.8) |
| HR-/HER2+ | 123(48.0) | 133(52.0) | 105(47.3) | 117(52.7) | 101(47.2) | 113(52.8) |
| HR+/HER2- | 61(13.3) | 398(86.7) | 51(12.8) | 349(87.3) | 49(13.6) | 312(86.4) |
| Triple negative | 106(45.7) | 126(54.3) | 97(45.8) | 115(54.2) | 96(47.3) | 107(52.7) |
| *χ2* | 127.7 | | 113.7 | | 104.4 | |
| *p* | <0.001 | | <0.001 | | <0.001 | |

**Supplemental Table S2** Multiple comparisons of pCR (ypT0) rates between different subtypes (significance threshold *p* < 0.008)

| **Subtypes** | **US** | | **MRI** | | **US+MRI** | |
| --- | --- | --- | --- | --- | --- | --- |
| ***χ2*** | ***p*** | ***χ2*** | ***p*** | ***χ2*** | ***p*** |
| 1 *vs.* 2 | 19.0 | <0.001 | 15.7 | <0.001 | 16.8 | <0.001 |
| 1 *vs.* 3 | 22.5 | <0.001 | 22.1 | <0.001 | 15.2 | <0.001 |
| 1 *vs.* 4 | 14.3 | <0.001 | 13.1 | <0.001 | 16.6 | <0.001 |
| 2 *vs.* 3 | 103.9 | <0.001 | 90.7 | <0.001 | 78.8 | <0.001 |
| 2 *vs.* 4 | 0.3 | 0.602 | 0.1 | 0.747 | 0.0 | 0.985 |
| 3 *vs.* 4 | 88.3 | <0.001 | 82.3 | <0.001 | 77.3 | <0.001 |

**Notes:** 1: HR+/HER2+, 2: HR-/HER2+, 3: HR+/HER2-, 4: Triple negative

**Supplemental Table S3** pCR (ypT0/is) rates in different subtypes

| **Subtypes** | **US** | | **MRI** | | **US+MRI** | |
| --- | --- | --- | --- | --- | --- | --- |
| **pCR** | **Non-pCR** | **pCR** | **Non-pCR** | **pCR** | **Non-pCR** |
| HR+/HER2+ | 80(37.2) | 135(62.8) | 73(37.1) | 124(62.9) | 67(36.4) | 117(63.6) |
| HR-/HER2+ | 153(59.8) | 103(40.2) | 134(60.4) | 88(39.6) | 128(59.8) | 86(40.2) |
| HR+/HER2- | 72(15.7) | 387(84.3) | 63(15.8) | 337(84.3) | 58(16.1) | 303(83.9) |
| Triple negative | 123(53.0) | 109(47.0) | 99(46.7) | 113(53.3) | 98(48.3) | 105(51.7) |
| *χ2* | 157.9 | | 139.4 | | 127.4 | |
| *p* | <0.001 | | <0.001 | | <0.001 | |

**Supplemental Table S4** Multiple comparisons of pCR (ypT0/is) rates between different subtypes (significance threshold *p* < 0.008)

| **Subtypes** | **US** | | **MRI** | | **US+MRI** | |
| --- | --- | --- | --- | --- | --- | --- |
| ***χ2*** | ***p*** | ***χ2*** | ***p*** | ***χ2*** | ***p*** |
| 1 *vs.* 2 | 23.8 | <0.001 | 22.7 | <0.001 | 21.7 | <0.001 |
| 1 *vs.* 3 | 38.8 | <0.001 | 34.1 | <0.001 | 28.6 | <0.001 |
| 1 *vs.* 4 | 4.4 | 0.037 | 3.9 | 0.048 | 5.6 | 0.018 |
| 2 *vs.* 3 | 148.1 | <0.001 | 131.3 | <0.001 | 117.5 | <0.001 |
| 2 *vs.* 4 | 8.0 | 0.005 | 8.1 | 0.004 | 5.6 | 0.018 |
| 3 *vs.* 4 | 78.1 | <0.001 | 68.2 | <0.001 | 67.4 | <0.001 |

**Notes:** 1: HR+/HER2+, 2: HR-/HER2+, 3: HR+/HER2-, 4: Triple negative

**Supplemental Table S5** Factors affecting the prediction of pCR by MRI

| **Factors** | **N** | **Sensitivity**  **(95%CI)** | **Specificity**  **(95%CI)** | **Accuracy**  **(95%CI)** | **PPV**  **(95%CI)** | **NPV**  **(95%CI)** |
| --- | --- | --- | --- | --- | --- | --- |
| Pathology |  |  |  |  |  |  |
| IDC | 898 | 46.2  (40.9-51.4) | 92.3  (90.1-94.6) | 74.3  (71.4-77.1) | 79.4  (73.9-85.0) | 72.8  (69.5-76.1) |
| Non-IDC | 133 | 11.1  (0.0-25.6) | 95.7  (91.9-99.4) | 84.2  (78.0-90.4) | 28.6  (0.0-62.0) | 87.3  (81.5-93.1) |
|  | *z/χ2* | 8.5 | 1.3 | 2.5 | 10.1 | 3.5 |
|  | *p* | 0.004 | 0.206 | 0.013 | 0.002 | <0.001 |
| Subtypes |  |  |  |  |  |  |
| HR+/HER2+ | 197 | 40.3  (28.9-51.6) | 92.0  (87.2-96.8) | 73.1  (66.9-79.3) | 74.4  (60.7-88.1) | 72.8  (65.8-79.7) |
| HR-/HER2+ | 222 | 47.0  (38.6-55.5) | 89.8  (83.4-96.1) | 64.0  (57.6-70.3) | 87.5  (79.9-95.1) | 52.7  (44.7-60.7) |
| HR+/HER2- | 400 | 29.7  (18.5-40.9) | 94.6  (92.2-97.1) | 84.3  (80.7-87.8) | 51.4  (35.2-67.5) | 87.6  (84.2-91.0) |
| Triple negative | 212 | 53.5  (43.7-63.4) | 91.4  (85.9-96.4) | 73.6  (67.7-79.5) | 84.1  (75.1-93.2) | 69.1  (61.7-76.5) |
|  | *χ2* | 9.8 | 3.5 | 33.6 | 20.6 | 73.8 |
|  | *p* | 0.020 | 0.317 | <0.001 | <0.001 | <0.001 |
| Size |  |  |  |  |  |  |
| ≤ 33 mm | 516 | 51.4  (44.7-58.2) | 91.5  (88.4-94.6) | 75.2  (71.5-78.9) | 80.6  (73.9-87.3) | 73.3  (68.9-77.7) |
| > 33 mm | 452 | 36.6  (28.4-44.7) | 94.0  (91.4-96.6) | 77.0  (73.1-80.9) | 72.1  (61.4-82.7) | 77.9  (73.7-82.0) |
|  | *z* | 2.7 | 1.2 | 0.7 | 1.4 | 1.5 |
|  | *p* | 0.007 | 0.223 | 0.513 | 0.168 | 0.141 |

**Supplemental Table S6** Multiple comparisons of prediction of pCR by MRI between different subtypes (significance threshold *p* < 0.008)

| **Subtypes** | **Sensitivity** | |  | **Accuracy** | |  | **PPV** | |  | **NPV** | |
| --- | --- | --- | --- | --- | --- | --- | --- | --- | --- | --- | --- |
| ***χ2*** | ***p*** |  | ***χ2*** | ***p*** |  | ***χ2*** | ***p*** |  | ***χ2*** | ***p*** |
| 1 *vs.* 2 | 0.9 | 0.354 |  | 4.0 | 0.045 |  | 3.1 | 0.079 |  | 13.4 | <0.001 |
| 1 *vs.* 3 | 1.7 | 0.197 |  | 10.5 | 0.001 |  | 4.3 | 0.038 |  | 17.2 | <0.001 |
| 1 *vs.* 4 | 2.9 | 0.087 |  | 0.0 | 0.911 |  | 1.5 | 0.227 |  | 0.5 | 0.480 |
| 2 *vs.* 3 | 5.4 | 0.021 |  | 33.2 | <0.001 |  | 17.1 | <0.001 |  | 74.0 | <0.001 |
| 2 *vs.* 4 | 1.0 | 0.325 |  | 4.7 | 0.031 |  | 0.3 | 0.574 |  | 8.5 | 0.004 |
| 3 *vs.* 4 | 9.0 | 0.003 |  | 10.1 | 0.002 |  | 12.4 | <0.001 |  | 24.7 | <0.001 |

**Notes:** 1: HR+/HER2+, 2: HR-/HER2+, 3: HR+/HER2-, 4: Triple negative

**Supplemental Table S7** Factors affecting the prediction of pCR by US+MRI

| Factors | N | Sensitivity | Specificity | Accuracy | PPV | NPV |
| --- | --- | --- | --- | --- | --- | --- |
| Pathology |  |  |  |  |  |  |
| IDC | 841 | 22.2  (17.6-26.9) | 97.8  (96.5-99.0) | 70.2  (67.2-73.4) | 85.0  (77.2-92.8) | 68.7  (65.4-72.0) |
| Non-IDC | 121 | 24.4  (11.9-37.0) | 100  (100-100) | 71.9  (63.9-79.9) | 100  (100-100) | 69.1  (60.5-77.7) |
|  | *z/χ2* | 0.33 | 1.74 | 0.37 | 1.90 | 0.08 |
|  | *p* | 0.739 | 0.187 | 0.714 | 0.168 | 0.938 |
| Subtypes |  |  |  |  |  |  |
| HR+/HER2+ | 184 | 20.0  (9.9-30.1) | 98.4  (96.2-100) | 72.8  (66.4-79.3) | 85.7  (67.4-100) | 71.8  (65.0-78.5) |
| HR-/HER2+ | 214 | 19.0  (10.3-27.6) | 99.3  (97.8-100) | 69.6  (63.5-75.8) | 93.8  (81.9-100) | 67.7  (61.2-74.2) |
| HR+/HER2- | 361 | 27.2  (19.7-34.7) | 97.8  (95.5-99.7) | 71.2  (66.5-75.9) | 88.1  (78.3-97.9) | 69.0  (63.9-74.0) |
| TN | 203 | 19.7  (10.8-28.7) | 96.9  (93.8-99.9) | 68.0  (61.6-74.4) | 78.9  (60.6-97.3) | 66.8  (60.0-73.6) |
|  | *χ2* | 2.83 | 2.13 | 1.26 | 1.77 | 1.14 |
|  | *p* | 0.418 | 0.545 | 0.739 | 0.621 | 0.767 |
| Size |  |  |  |  |  |  |
| ≤ 33 mm | 489 | 19.0  (13.1-25.0) | 97.5  (95.8-99.2) | 70.6  (66.5-74.6) | 80.0  (67.6-92.4) | 69.7  (65.5-74.0) |
| > 33 mm | 419 | 26.1  (19.3-32.9) | 98.4  (96.9-100) | 70.6  (66.3-75.0) | 91.3  (83.2-99.4) | 68.1  (63.4-72.8) |
|  | *z* | 1.53 | 0.79 | 0.03 | 0.51 | 0.50 |
|  | *p* | 0.126 | 0.429 | 0.976 | 0.131 | 0.618 |
